# Supplementary material for: Silver nanoparticles reduce brain inflammation and related neurotoxicity through induction of H2S-synthesizing enzymes
Source: PubMed Central journal article supplement (PMC5333087; doi:10.1038/srep42871), 2017-03-02
Supplement: srep42871-s1.pdf [file srep42871-s1.pdf]

## **Silver nanoparticles reduce brain inflammation and related neurotoxicity through induction of H<sub>2</sub>S-synthesizing enzymes**

Daniel A. Gonzalez-Carter<sup>1,2 a\*</sup>, Bey Fen Leo<sup>1,3 a</sup>, Pakatip Ruenraroengsak<sup>1,4</sup>, Shu Chen<sup>1</sup>, Angela E Goode<sup>1</sup>, Ioannis G. Theodorou<sup>1</sup>, Fan Chung<sup>4</sup>, Raffa Carzaniga<sup>5</sup>, Milo S.P. Shaffer<sup>1,6</sup>, David T. Dexter<sup>2</sup>, Mary P. Ryan<sup>1</sup>, Alexandra E. Porter<sup>1\*</sup>

<sup>1</sup>Department of Materials and London Centre for Nanotechnology, Imperial College London, Exhibition Road, London, UK, SW7 2AZ

<sup>2</sup>Parkinson's Disease Research Unit, Centre for Neuroinflammation and Neurodegeneration, Division of Brain Sciences, Imperial College London, Hammersmith Hospital Campus, London, UK, W12 0NN

<sup>3</sup>Nanotechnology & Catalysis Research Centre (NANOCAT), University of Malaya, Kuala Lumpur 50603, Malaysia

<sup>4</sup>National Heart and Lung Institute, Imperial College London, Guy Scadding Building, Cale Street, London, UK, SW3 6LY

<sup>5</sup>Electron Microscopy Unit, The Francis Crick Institute, Lincoln's Inn Fields Laboratory, 44 Lincoln's Inn Fields, London, UK, WC2A 3LY

<sup>6</sup>Department of Chemistry and London Centre for Nanotechnology, Imperial College London, Exhibition Road, London, UK, SW7 2AZ

<sup>a</sup>These authors contributed equally to this work.

\*Corresponding authors: [daniel.gonzalez-carter08@imperial.ac.uk](mailto:daniel.gonzalez-carter08@imperial.ac.uk);  
a.porter@imperial.ac.uk

## Supporting Methods

*Commercially acquired silver nanoparticles:* Citrate-capped silver nanoparticles (AgNP) were purchased from nanoComposix (California, USA). According to the manufacturer's specifications, AgNP in aqueous solution had a mean diameter of  $51 \pm 6$  nm, as assessed by TEM, and a  $\zeta$ -potential of  $-48$  mV. The purity of the nanoparticles was 99.99% silver.

## Supporting figures

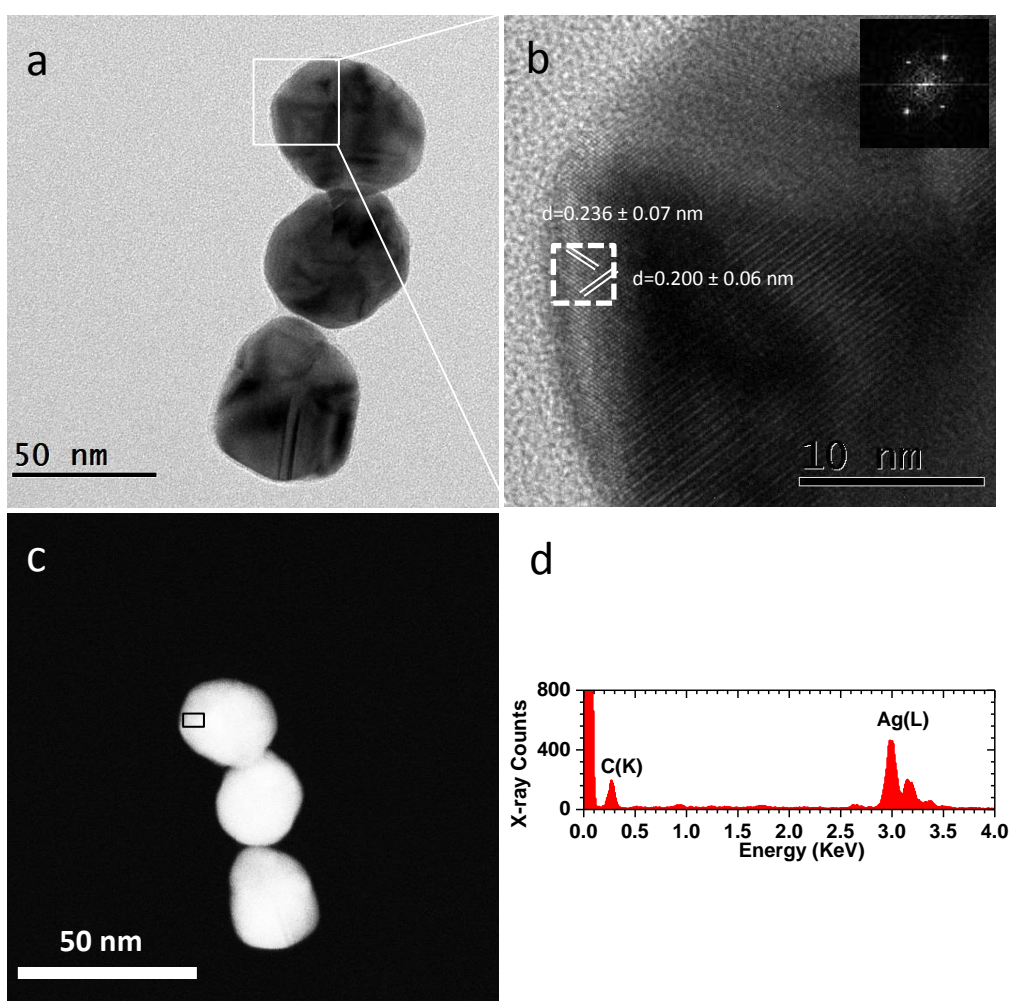

**Fig. S1. TEM characterization of AgNPs incubated in RPMI cell culture media for 24 h at 37 °C.** (a) Low resolution TEM image of the AgNPs. (b) HR-TEM analysis showing the lattice spacing of  $\sim 0.236$  and  $\sim 0.200$  nm, corresponding to interplanar spacing of bulk Ag (111) and (200) lattice planes, respectively (ref. #01-087-0597); inset is the FFT pattern taken from the dashed boxed area. (c) HAADF-STEM image taken from the same area as (a). (d) STEM-EDX spectrum collected from the boxed area in (c). TEM analyses were performed in a Jeol 2100F scanning/transmission electron microscope (S/TEM) operated at 200 kV, fitted with a X-MaxN Silicon Drift Detector with a detector sizes of  $80 \text{ mm}^2$

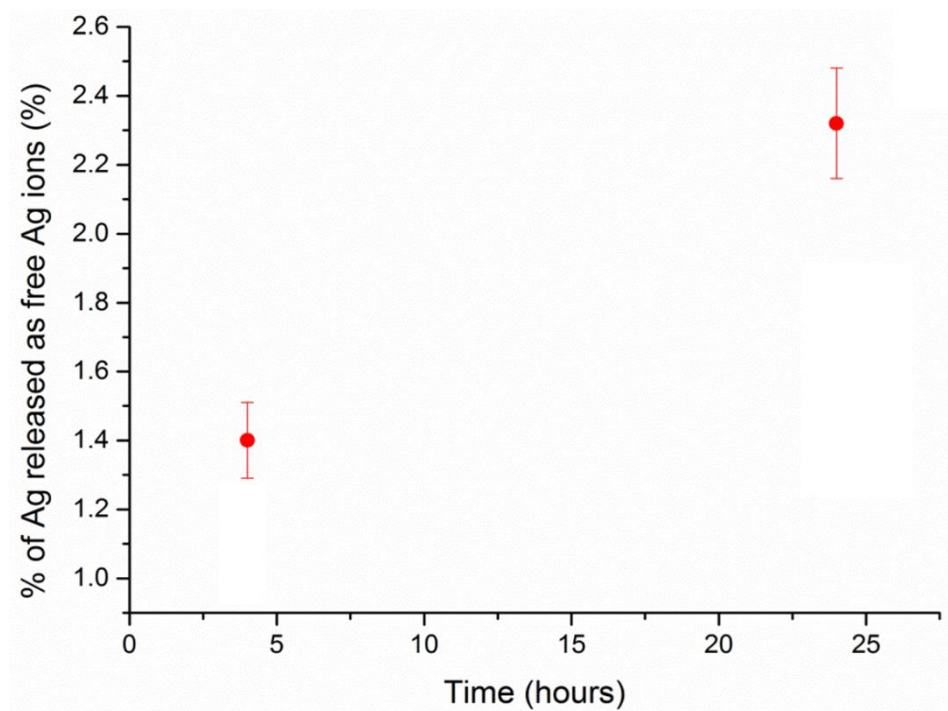

**Fig. S2. Dissolution kinetics of AgNP.** ICP-AES was employed to quantify the amount of free Ag<sup>+</sup> ions released from AgNPs in non-interacting perchlorate buffer solution (pH 5) after a 4h or 24h incubation. Results are displayed as mean  $\pm$  SEM of three independent experiments.

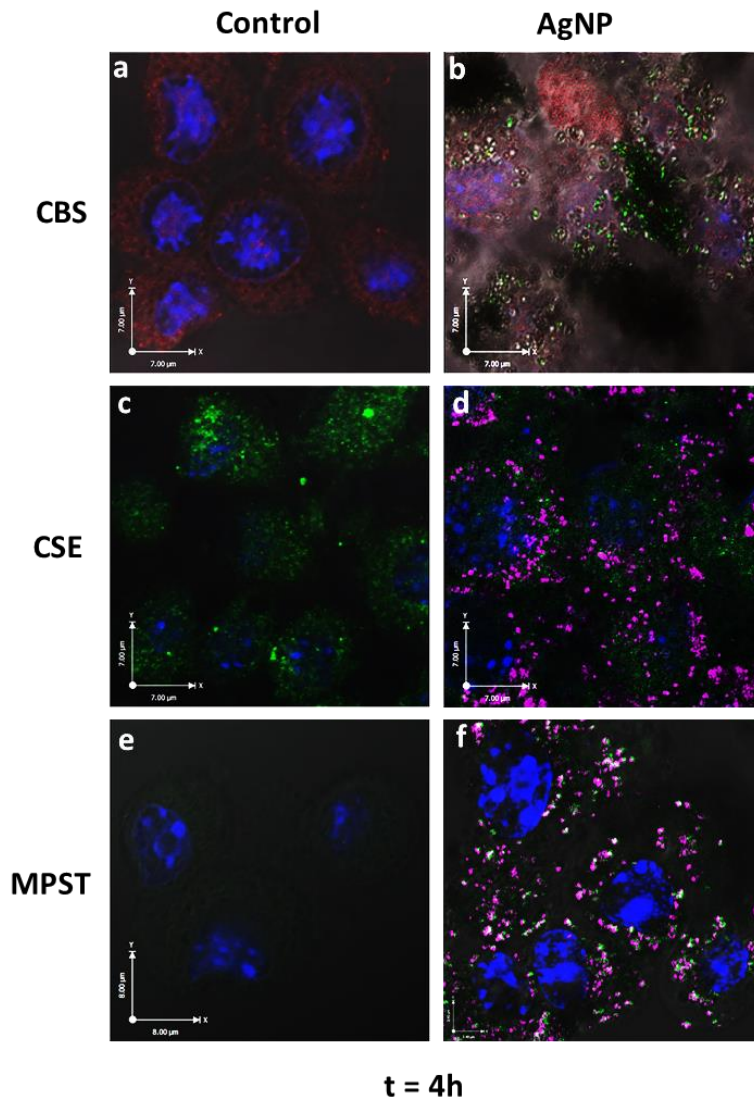

**Fig. S3. The cellular uptake and distribution of AgNPs (50 μg/mL) inside N9 microglial cells combined with CBS, CSE and MPST enzyme expression following a 1h pulse treatment with a 4h chase period.** Confocal images of CBS (a,b), CSE (c,d) and MPST (e,f) enzyme expression in control (a,c,e) and AgNP-treated (b,d,f) microglial cells. For images (a) and (b), CBS = red; AgNP = green; DAPI = blue. For images (c-f) CSE/MPST enzyme = green, AgNP = magenta, DAPI = blue. Images are representative of three independent experiments.

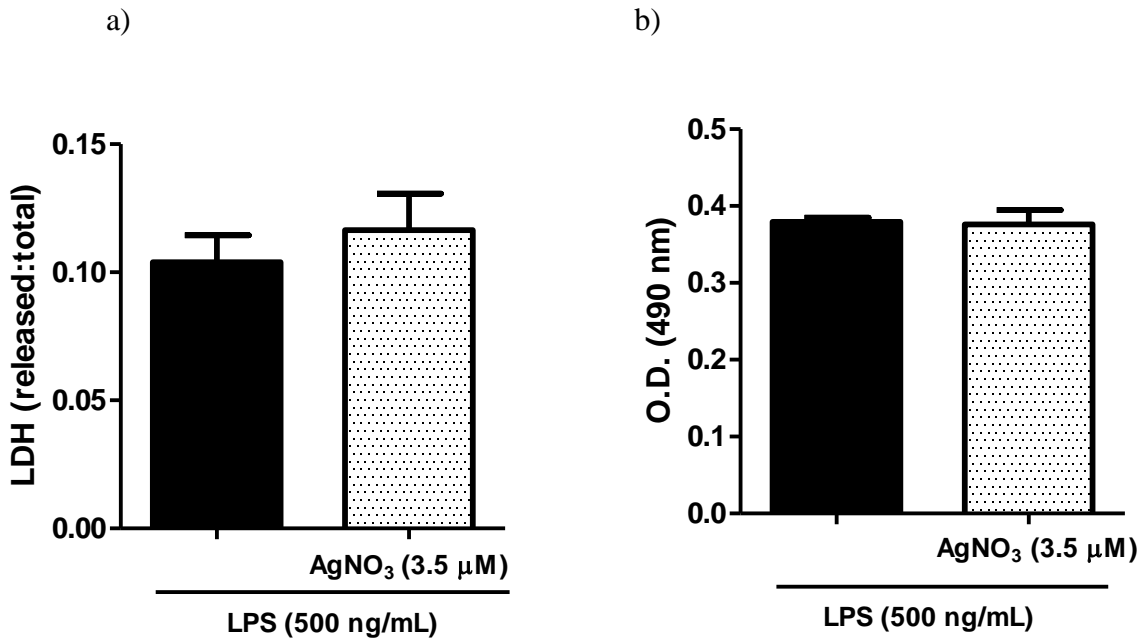

**Fig. S4. Cytotoxicity of AgNO<sub>3</sub> treatment on microglia cells.** LDH release assay (a) and MTS metabolic activity assay (b) of N9 microglia treated with LPS (500 ng/mL) with or without AgNO<sub>3</sub> (3.5 μM) for 1hr (pulse) followed by a 24 hr chase period. Results are displayed as mean ± SEM of three independent experiments. Statistical significance was examined by a student's T-test with a significance value  $p < 0.05$ .

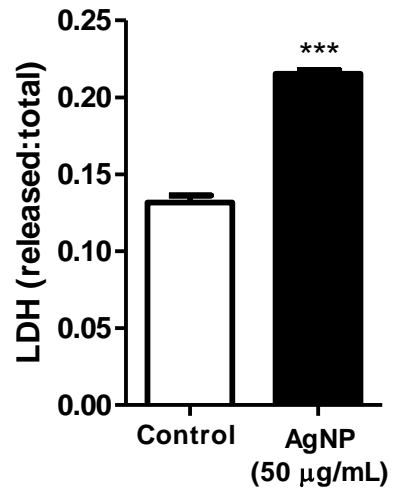

**Fig. S5. Cytotoxicity of AgNP treatment on dopaminergic neuronal cells.** N27 neurons were treated with AgNP (50 µg/mL) for 1 hr (pulse) followed by a 24 hr chase period, after which time-point cytotoxicity was assessed through an LDH release assay. Results are displayed as mean  $\pm$  SEM of four independent experiments. \*\*\* denote  $p < 0.005$  vs. control, as determined by a student's T-test.

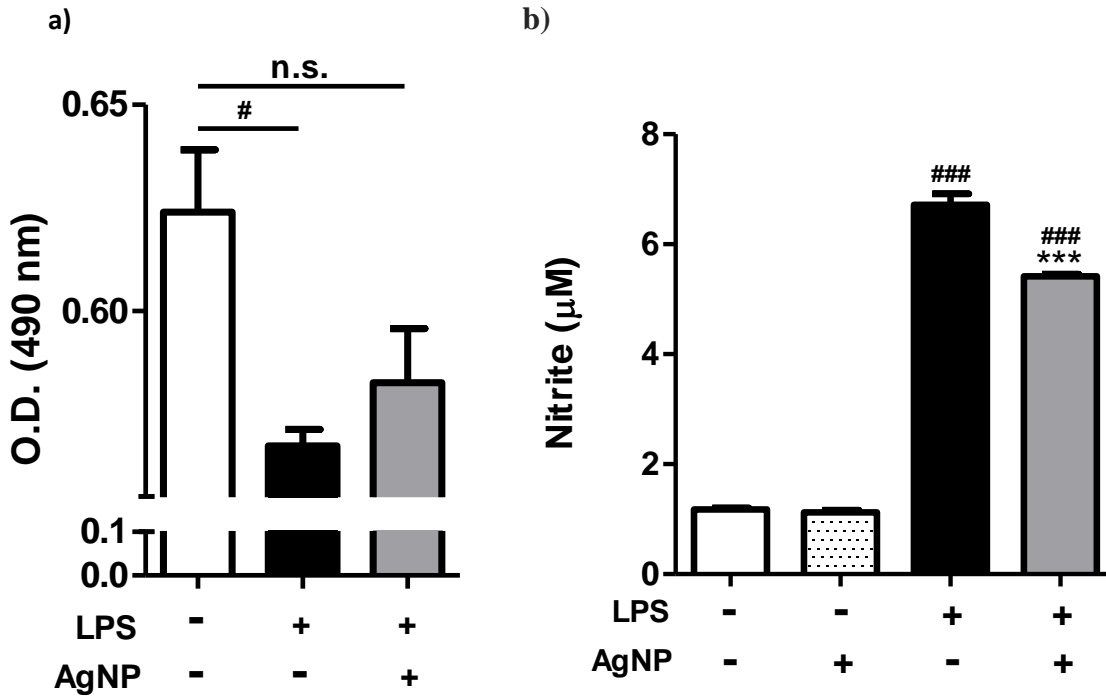

**Fig. S6. Effect of commercially acquired AgNP on microglial neurotoxicity and inflammation.**

(a) Dopaminergic N27 neurons were incubated (48hr) with medium derived from control, LPS (500 ng/mL)- or LPS plus AgNP (50 µg/mL)-treated (24hr LPS treatment, 1hr pulse/24hr chase AgNP treatment) N9 microglia and neurotoxicity assessed through quantification of metabolic activity through an MTS assay. (b) Inflammation of control, LPS- or LPS plus AgNP-treated (1hr pulse/24hr chase) N9 microglia was assessed by quantification of nitrite production through a Griess assay. Results are displayed as mean  $\pm$  SEM of three independent experiments. #, ### denote  $p < 0.05$ ,  $0.001$  vs. control, respectively. \*\*\* denotes  $p < 0.001$  vs. LPS treatment. Statistical significance was determined by a one-way ANOVA with a Tukey's *post-hoc* test.

**Table S1:** The lattice planes at the surface or the core of AgNPs/AgNWs (boxed areas in Fig, 2d) were identified by measuring the interplanar spacing from FFT.

| <b>Samples</b> | <b>Interplanar spacing from FFT (nm)</b> | <b>lattice plane</b>     |
|----------------|------------------------------------------|--------------------------|
| <b>c(i)</b>    | 2.093                                    | Ag (200)                 |
|                | 2.402                                    | Ag (111)                 |
|                | 2.328                                    | Ag (111)                 |
| <b>c(ii)</b>   | 2.454                                    | Ag <sub>2</sub> S (112)  |
|                | 2.779                                    | Ag <sub>2</sub> S (-112) |
| <b>c(iii)</b>  | 2.429                                    | Ag <sub>2</sub> S (112)  |
|                | 2.085                                    | Ag <sub>2</sub> S (200)  |
| <b>f(i)</b>    | 2.356                                    | Ag <sub>2</sub> S (-103) |
|                | 3.072                                    | Ag <sub>2</sub> S (111)  |
|                | 2.796                                    | Ag <sub>2</sub> S (-112) |
| <b>f(ii)</b>   | 3.115                                    | Ag <sub>2</sub> S (111)  |
|                | 2.594                                    | Ag <sub>2</sub> S(-121)  |
| <b>f(iii)</b>  | 2.478                                    | Ag <sub>2</sub> S(112)   |
|                | 2.574                                    | Ag <sub>2</sub> S (022)  |



**Table S2:** The crystal structure of silver and various silver compounds based on the Inorganic Crystal Structure Database.

| <b>Ag Crystal System (Cubic) - ICSD ref: 01-087-0597</b> |          |          |             |                   |              |
|----------------------------------------------------------|----------|----------|-------------|-------------------|--------------|
| <b>h</b>                                                 | <b>k</b> | <b>l</b> | <b>d(Å)</b> | <b>2Theta (°)</b> | <b>I (%)</b> |
| 1                                                        | 1        | 1        | 2.359       | 38.115            | 100.0        |
| 2                                                        | 0        | 0        | 2.043       | 44.299            | 45.7         |
| 2                                                        | 2        | 0        | 1.445       | 64.443            | 22.5         |
| 3                                                        | 1        | 1        | 1.232       | 77.397            | 22.2         |

  

| <b>AgCl crystal system (Cubic) - ICSD ref: 00-031-1238</b> |          |          |             |                   |              |
|------------------------------------------------------------|----------|----------|-------------|-------------------|--------------|
| <b>h</b>                                                   | <b>k</b> | <b>l</b> | <b>d(Å)</b> | <b>2Theta (°)</b> | <b>I (%)</b> |
| 2                                                          | 0        | 0        | 2.774       | 32.244            | 100.0        |
| 2                                                          | 2        | 0        | 1.962       | 46.234            | 50.0         |
| 1                                                          | 1        | 1        | 3.203       | 27.831            | 50.0         |

  

| <b>Ag<sub>2</sub>O crystal system (Cubic) - ICSD ref: 00-041-1104</b> |          |          |             |                   |              |
|-----------------------------------------------------------------------|----------|----------|-------------|-------------------|--------------|
| <b>h</b>                                                              | <b>k</b> | <b>l</b> | <b>d(Å)</b> | <b>2Theta (°)</b> | <b>I (%)</b> |
| 1                                                                     | 1        | 1        | 2.729       | 32.791            | 100.0        |
| 2                                                                     | 0        | 0        | 2.360       | 38.067            | 28.0         |

  

| <b>Ag<sub>2</sub>S crystal system (Monoclinic) - ICSD ref: 00-014-0072</b> |          |          |             |                   |              |
|----------------------------------------------------------------------------|----------|----------|-------------|-------------------|--------------|
| <b>h</b>                                                                   | <b>k</b> | <b>l</b> | <b>d(Å)</b> | <b>2Theta (°)</b> | <b>I (%)</b> |
| -1                                                                         | 2        | 1        | 2.606       | 34.385            | 100.0        |
| 1                                                                          | 2        | 1        | 2.440       | 36.806            | 80.0         |
| -1                                                                         | 0        | 3        | 2.383       | 37.719            | 75.0         |
| -1                                                                         | 1        | 2        | 2.836       | 31.521            | 70.0         |
| 0                                                                          | 2        | 2        | 2.583       | 34.701            | 70.0         |
| 1                                                                          | 1        | 2        | 2.456       | 36.557            | 70.0         |
| 1                                                                          | 1        | 1        | 3.080       | 28.967            | 60.0         |
| 0                                                                          | 1        | 3        | 2.421       | 37.105            | 60.0         |
| 0                                                                          | 3        | 1        | 2.213       | 40.740            | 45.0         |
| 2                                                                          | 0        | 0        | 2.083       | 43.407            | 45.0         |
| -1                                                                         | 1        | 1        | 3.437       | 25.902            | 35.0         |
| -2                                                                         | 1        | 3        | 1.718       | 53.278            | 20.0         |
| 0                                                                          | 1        | 2        | 3.383       | 26.323            | 20.0         |

**Table S3: List of ligands which are found in the CBS enzyme structures (source: European Protein Data Bank)**

**Cystathionine-β-synthase (CBS)** (Enzyme Commission number, EC 4.2.1.22)

| LIGAND | FORMULA                                                          | SYSTEMATIC NAME                                                                       |
|--------|------------------------------------------------------------------|---------------------------------------------------------------------------------------|
| PLP    | C <sub>8</sub> H <sub>10</sub> N O <sub>6</sub> P                | PYRIDOXAL-5'-PHOSPHATE                                                                |
| HEM    | C <sub>34</sub> H <sub>32</sub> Fe N <sub>4</sub> O <sub>4</sub> | PROTOPORPHYRIN IX CONTAINING FE                                                       |
| NA     | Na                                                               | SODIUM ION                                                                            |
| MPD    | C <sub>6</sub> H <sub>14</sub> O <sub>2</sub>                    | (4S)-2-METHYL-2, 4-PENTANEDIOL                                                        |
| ACT    | C <sub>2</sub> H <sub>3</sub> O <sub>2</sub>                     | ACETATE ION                                                                           |
| PE4    | C <sub>16</sub> H <sub>34</sub> O <sub>8</sub>                   | 2-(2-[2-(2-(2-[2-(2-ETHOXY-ETHOXY)-ETHOXY]-ETHOXY-ETHOXY)-ETHOXY]-ETHOXY)-ETHANOL     |
| KOU    | C <sub>11</sub> H <sub>15</sub> N <sub>2</sub> O <sub>8</sub> P  | (E)-N-((3-hydroxy-2-methyl-5-[(phosphonooxy)methyl]pyridin-4-yl)methylidene)-L-serine |
| SEP    | C <sub>3</sub> H <sub>8</sub> N O <sub>6</sub> P                 | PHOSPHOSERINE                                                                         |
| P1T    | C <sub>11</sub> H <sub>15</sub> N <sub>2</sub> O <sub>7</sub> P  | 2-[(3-HYDROXY-2-METHYL-5-[(PHOSPHONOOXY)METHYL]PYRIDIN-4-YL)METHYL)AMINO]ACRYLIC ACID |
| EDO    | C <sub>2</sub> H <sub>6</sub> O <sub>2</sub>                     | 1,2-ETHANEDIOL                                                                        |
| OAS    | C <sub>5</sub> H <sub>9</sub> N O <sub>4</sub>                   | O-ACETYL SERINE                                                                       |

**Table S5: List of ligands which are found in the CSE enzyme structures (source: European Protein Data Bank).**

**Cystathionine γ-lyase (CSE)** (EC 4.4.1.1)

| LIGAND | FORMULA                                                         | SYSTEMATIC_NAME                                                                         |
|--------|-----------------------------------------------------------------|-----------------------------------------------------------------------------------------|
| GOL    | C <sub>3</sub> H <sub>8</sub> O <sub>3</sub>                    | GLYCEROL                                                                                |
| PLP    | C <sub>8</sub> H <sub>10</sub> N O <sub>6</sub> P               | PYRIDOXAL-5'-PHOSPHATE                                                                  |
| OJO    | C <sub>11</sub> H <sub>13</sub> N <sub>2</sub> O <sub>7</sub> P | 2-[[E]-{3-hydroxy-2-methyl-5-[(phosphonooxy)methyl]pyridin-4-yl}methylidene]amino}prop- |

|     |                                                                 |                                                                                       |
|-----|-----------------------------------------------------------------|---------------------------------------------------------------------------------------|
| SO4 | O <sub>4</sub> S                                                | 2-enoic acid<br>SULFATE ION                                                           |
| SER | C <sub>3</sub> H <sub>7</sub> N O <sub>3</sub>                  | SERINE                                                                                |
| PYR | C <sub>3</sub> H <sub>4</sub> O <sub>3</sub>                    | PYRUVIC ACID                                                                          |
| NAK | C <sub>3</sub> H <sub>5</sub> N O <sub>2</sub>                  | AMINO-ACRYLATE                                                                        |
| KOU | C <sub>11</sub> H <sub>15</sub> N <sub>2</sub> O <sub>8</sub> P | (E)-N-({3-hydroxy-2-methyl-5-[(phosphonooxy)methyl]pyridin-4-yl}methylidene)-L-serine |
| 2AG | C <sub>5</sub> H <sub>9</sub> N O <sub>2</sub>                  | (2S)-2-aminopent-4-enoic acid                                                         |
| NO3 | N O <sub>3</sub>                                                | NITRATE ION                                                                           |
| PEG | C <sub>4</sub> H <sub>10</sub> O <sub>3</sub>                   | DI(HYDROXYETHYL)ETHER                                                                 |
| BCT | C H O <sub>3</sub>                                              | BICARBONATE ION                                                                       |
| BME | C <sub>2</sub> H <sub>6</sub> O S                               | BETA-MERCAPTOETHANOL                                                                  |
| CO3 | C O <sub>3</sub>                                                | CARBONATE ION                                                                         |

**Table S6: List of ligands which are found in the MPST enzyme structures (source: European Protein Data Bank).**

**3-mercaptopyruvate sulfurtransferase (MPST) (EC 2.8.2.1)**

| LIGAND | FORMULA                                      | SYSTEMATIC_NAME |
|--------|----------------------------------------------|-----------------|
| GOL    | C <sub>3</sub> H <sub>8</sub> O <sub>3</sub> | GLYCEROL        |
| SO4    | O <sub>4</sub> S                             | SULFATE ION     |
| PYR    | C <sub>3</sub> H <sub>4</sub> O <sub>3</sub> | PYRUVIC ACID    |
